1 **Specific enrichment of hyperthermophilic electroactive *Archaea* from**  
2 **deep-sea hydrothermal vent on electrically conductive support.**

3

4 Guillaume Pillot<sup>1</sup>, Eléonore Frouin<sup>1</sup>, Emilie Pasero<sup>1</sup>, Anne Godfroy<sup>2</sup>, Yannick Combet-Blanc<sup>1</sup>,  
5 Sylvain Davidson<sup>1</sup> & Pierre-Pol Liebgott<sup>1\*</sup>

6 <sup>1</sup> Aix Marseille Université, IRD, Université de Toulon, CNRS, MIO UM 110, Marseille, France.

7 <sup>2</sup> Laboratoire de Microbiologie des Environnements Extrêmes - UMR6197 IFREMER, CNRS,  
8 UBO Centre de Brest–CS10070/IUEM, Plouzané, France.

9 \*Corresponding author: [pierre-pol.liebgott@mio.osupytheas.fr](mailto:pierre-pol.liebgott@mio.osupytheas.fr); Mediterranean Institute of  
10 Oceanography, Campus de Luminy, Bâtiment OCEANOMED, 13288 Marseille Cedex 09.

11 **Abstract**

12 While more and more investigations are done to isolate hyperthermophilic exoelectrogenic  
13 communities from environments, none have been performed yet on deep-sea hydrothermal vent.  
14 Samples of black smoker chimney from Rainbow site on the Atlantic mid-oceanic ridge have  
15 been harvested for enriching exoelectrogens in microbial electrolysis cells under hyperthermophilic  
16 (80°C) condition. Two enrichments have been performed: one from direct inoculation of crushed  
17 chimney and the other one from inoculation of a pre-cultivation on iron (III) oxide. In both  
18 experiments, a current production was observed from 2.4 A/m<sup>2</sup> to 5.8 A/m<sup>2</sup> with a set anode  
19 potential of +0.05 vs SHE. Taxonomic affiliation of the exoelectrogen communities obtained  
20 exhibited a specific enrichment of *Archaea* from *Thermococcales* and *Archeoglobales* orders on the  
21 electrode, even when both inocula were dominated by *Bacteria*.

22 **Keywords**

23 Hyperthermophilic exoelectrogens, Deep-sea hydrothermal vent, Microbial electrolysis cell,  
24 External Electron Transfer

25

## 26 **1. Introduction**

27 Since the discovery of the first deep-sea hydrothermal vent in 1977, many studies have  
28 expanded our understanding of extremophilic life forms in those environments. The "black  
29 smoker" deep-sea hydrothermal vents, located along the ridges of the Atlantic, Pacific and  
30 Indian oceans, are the result of volcanic activities that generate hydrothermal chimneys  
31 composed of polymetallic sulfide minerals (heterogeneous pyrite) (Dick et al. 2013). Those  
32 environments exhibit dynamic habitats that are characterized by large steep thermal and  
33 chemical gradients. These gradients provide a wide range of growth conditions for many  
34 extremophilic microorganisms growing as biofilms and being the base of these specific  
35 deep-sea ecosystems (Flores et al. 2011; Kristall et al. 2006). In these environments has  
36 been shown the presence of thermophilic microorganisms from the *Archaea* domain,  
37 mainly belonging to the orders *Thermococcales*, *Methanococcales*, and *Archaeoglobales*,  
38 whereas mesophilic and thermophilic microorganisms from the *Bacteria* domain belong to  
39 *Epsilon-proteobacteria* (Huber et al. 2010; Vetriani et al. 2014) and to the orders  
40 *Aquificales* and *Thermotogales* (Miroshnichenko and Bonch-Osmolovskaya, 2006).  
41 Considering the mineralogical composition of these hydrothermal chimneys (polymetallic  
42 massive sulfide), it appears likely that a significant proportion of its microbial populations  
43 is dependent on energetic metabolisms based on the dissimilatory reduction of insoluble  
44 "metals" or sulfurs compounds (Cao et al. 2014; Konn et al. 2015).

45 As the microbial cell envelope is neither physically permeable to insoluble minerals nor  
46 electrically conductive, microorganisms have evolved strategically to exchange electrons  
47 with insoluble extracellular minerals, a mechanism known as the extracellular electrons  
48 transfer (EET) (Hinks et al. 2017; Shi et al. 2016). The first described EET capable

49 bacteria were *Shewanella* and *Geobacter* (Shi et al. 2007). The role of membrane bound  
50 electron transport chains in carrying out EET was well acknowledged, but the exact  
51 mechanisms are still not completely understood (Kumar et al. 2017). Most of the  
52 knowledge about EET in microbes is derived from studies in bioelectrochemical systems  
53 (Allen and Bennetto, 1993; Logan et al. 2006; Schröder et al. 2015) which helped to define  
54 a novel group of microorganisms called exoelectrogens. These exoelectrogenic  
55 microorganisms are capable of extracellular electron transfer to a solid electrode, which are  
56 used in Microbial Electrochemical Technologies (METs) such as Microbial Fuel Cells  
57 (MFC) and microbial electrolysis cells (MEC) (Doyle and Marsili, 2015). In the past years,  
58 exoelectrogenic activity has been reported in almost 100 microbial species which are  
59 mostly affiliated with the bacterial phylum *Proteobacteria* (Koch and Harnisch, 2016). It  
60 includes the extensively studied *Geobacter sp.* (Busalmen et al. 2008; Reguera et al. 2006)  
61 and *Shewanella sp.* (Gorby et al. 2006; Marsili et al. 2008), as well as *Cyanobacteria*  
62 (J. McCormick et al. 2011; Sekar et al. 2014). All these microorganisms are mesophilic  
63 and grow optimally at moderate temperatures, ranging from 20°C to 45°C. To date, only  
64 four thermophiles, *Thermincola ferriacetica* (Marshall and May, 2009), *Thermincola*  
65 *potens* strain JR (Wrighton et al. 2011), *Calditerrivibrio nitroreducens* (Fu et al. 2013) and  
66 *Thermoanaerobacter pseudethanolicus* (Lusk et al. 2015), all isolated from extreme natural  
67 environments, were shown to generate electricity in MFCs operating at a temperature  
68 higher than 50°C. Moreover, it is only very recently that two hyperthermophilic strains,  
69 *Pyrococcus furiosus* and *Geoglobus ahangari*, have been shown to have the capacity to  
70 produce electricity in MFC or MEC (Sekar et al. 2017; Yilmazel et al. 2018). This would  
71 be the two first hyperthermophilic archaeon strains described having the capacity of EET.  
72 Several studies reported the enrichment of mixed cultures of efficient thermophilic  
73 exoelectrogens on the anode of METs (Ha et al. 2012; Jong et al. 2006; Mathis et al. 2007;

74 Wrighton et al. 2008). More recently, two exoelectrogenic biofilms have been enriched at  
75 70°C from a high-temperature petroleum reservoir (Fu et al. 2015) and at 80°C from Red  
76 Sea brine pools (Shehab et al. 2017) on the anode of MFC systems. To the best of our  
77 knowledge, no exoelectrogenic biodiversity enrichment from deep-sea hydrothermal vents  
78 has been achieved yet, while it seems likely that some microbial populations require this  
79 type of energy metabolism to expand in these particular environments. Interestingly, a  
80 MFC was installed at a hydrothermal vent field (Girguis and Holden, 2012) showing for  
81 the first time, the *in situ* electricity generation in those extreme ecosystems. More recently  
82 it has been demonstrated that there is a widespread and distant electron transfer through the  
83 electrically conductive hydrothermal chimney by the internal oxidation of the  
84 hydrothermal fluid coupled to the reduction of oxygenated seawater at the external side of  
85 the chimney (Yamamoto et al. 2017). This electricity generation in deep-sea hydrothermal  
86 systems must affect the surrounding biogeochemical processes and the development of  
87 microbial communities through potential EET-capable microorganisms.

88 The aim of this study was to promote and identify a part of the exoelectrogenic microbial  
89 community from a hydrothermal chimney of the Rainbow site on the Atlantic mid-oceanic  
90 ridge. For this investigation, two experiments were carried out using a semiautomatic two-  
91 chamber BioElectrochemical System Stirred-Reactor (BES-SR) prototype (graphical  
92 abstract), operating at high temperatures (80°C). The first one was performed to enrich  
93 microbes in our BES-SR system, directly from a chimney fragment. The second  
94 enrichment in BES was carried out from an inoculum obtained by a microbial enrichment  
95 culture in flask on Fe(III) oxide particles as electron acceptor using the same hydrothermal  
96 sample. This was done in order to pre-cultivate potential exoelectrogenic microbes on iron  
97 oxide and observing the impact on biodiversity obtained subsequently in BES. The  
98 evolution of current production, of microbial diversity and biomass during the different

99 enrichments have been studied through electrochemical method and molecular biology  
100 survey.

## 101 **2. Material and methods**

### 102 *2.1. Sample collection and preparation*

103 The inoculum used for all the experiments was collected on the Rainbow hydrothermal vent field  
104 (36°14'N, MAR) by the Remote Operated Vehicle VICTOR 6000 during EXOMAR cruise in 2005  
105 led by IFREMER (France) on board RV L'Atalante (Godfroy, 2005) . Sample (EXO8E1) was  
106 collected by breaking off a piece of a high temperature active black smoker using the arm of the  
107 submersible and bring back to the surface into a decontaminated insulated box. On board, chimney  
108 fragments were anaerobically crushed into an anaerobic chamber (La Calhene, France) and stored  
109 into flasks under anaerobic conditions (anoxic seawater at pH 7 with hydrogen sulfide and  
110 N<sub>2</sub>:H<sub>2</sub>:CO<sub>2</sub> (90:5:5) gas atmosphere) and kept at 4°C. Prior to the experiment, pieces of  
111 hydrothermal chimney were removed from the sulfidic seawater flask, crushed in a sterile mortar  
112 and pestle in an anaerobic chamber (Coy Laboratories Inc.) and distributed in anaerobic tubes for  
113 further different experiments.

### 114 *2.2. Enrichment on iron oxide in flask*

115 To obtain enrichment of electro-active microbes on insoluble iron (III) oxide as electron acceptor,  
116 2.5g of crushed hydrothermal chimney was inserted in 500 ml flasks under nitrogen gas  
117 atmosphere filled with 250ml of mineral medium at pH 7 containing 30 g/l NaCl, 0.65 g/l KCl, 0.5  
118 g/l NH<sub>4</sub>Cl, 0.3 g/l KH<sub>2</sub>PO<sub>4</sub>, 0.3 g/l K<sub>2</sub>HPO<sub>4</sub>, 0.1 g/l MgCl<sub>2</sub>, 0.1 g/l CaCl<sub>2</sub>, 0.35 g/l Cysteine HCl,  
119 0.2 g/l of yeast extract and 10ml/l of Balch trace mineral solution (Uzarraga et al. 2011). The media  
120 was supplemented with 1g/l of iron (III) oxide, and 10mM of acetate or 4g/l of yeast extract as  
121 electron donor and carbon source. The flasks were incubated at 80°C in static condition until a dark  
122 coloration of iron oxide was observed. Two subcultures were performed in the same condition with  
123 1% of inoculum from the previous culture.

### 124 2.3. *Semi-Automated Bioelectrochemical Systems*

125 A prototype of semi-automated BioElectrochemical System in Stirred-Reactor (BES-SR) has been  
126 developed to assess the enrichment of hyperthermophilic electroactive microorganisms. The system  
127 was composed of a two-chamber jacketed glass reactor (Verre Labo Mula, France) with a 1.5L  
128 working volume, thermostated with a Heating Circulator (Julabo SE 6, France) at  $80^{\circ}\text{C} \pm 1^{\circ}\text{C}$ ,  
129 and separated by an Anion Exchange membrane (Membrane International Inc.). The working  
130 electrode was a  $20\text{ cm}^2$  carbon cloth (PaxiTech SAS, France) with a 3M Ag/AgCl reference  
131 electrode and the counter electrode a  $20\text{cm}^2$  carbon cloth coated with platinum (Hogarth, 1995).

132 The bioelectrochemical system was connected to a semi-automated platform previously described  
133 (Boileau et al. 2016) to control the composition and rate of gas input ( $\text{H}_2$ ,  $\text{CO}_2$ ,  $\text{O}_2$ ,  $\text{N}_2$ ) with mass  
134 flowmeters (Bronkhorst, Netherlands) and a continuous monitoring of output gas composition ( $\text{H}_2$ ,  
135  $\text{N}_2$ ,  $\text{CH}_4$ ,  $\text{O}_2$ ) using a micro-GC equipped with a catharometric detector (MS5A, SRA Instrument,  
136 France). To ensure anaerobic condition, the culture medium was continually sparged with a 50  
137 ml/min flow of  $\text{N}_2$ . The pH was maintained at  $7 \pm 0.1$  by the addition of sodium hydroxide (NaOH  
138  $0.5\text{ mmol/L}$ ) or hydrochloric acid (HCl  $0.5\text{ mmol/L}$ ). The stirring, driven by two axial impellers,  
139 was set to 150 rpm. The measurements of pH and ORP (Mettler Toledo InPro 3253, Switzerland),  
140 temperature (Prosensor pt 100, France), stirring,  $\text{CO}_2$  with a CARBOCAP  $\text{CO}_2$  probe (Vaisala  
141 GMT 221, Finland),  $\text{H}_2$ ,  $\text{N}_2$ ,  $\text{CH}_4$ ,  $\text{O}_2$ , bioreactor liquid volume, NaOH and HCl consumption were  
142 measured and managed by the BatchPro software (Decobecq Automatismes, France). SP-240  
143 potentiostats and EC-Lab software (BioLogic, France) were used to poise the electrodes at a fixed  
144 potential and measure current. All the measured currents are expressed in ampere per square meter  
145 of electrode area.

### 146 2.4. *Operating conditions in BES-SR*

147 Before each experiment, the bioelectrochemical system was dismantled, washed, and sterilized by  
148 autoclaving at  $120^{\circ}\text{C}$  for 20 min. Then, the system was connected to the platform and 1,5L of  
149 mineral medium was injected and supplemented with 10 mM acetate and 0.15 g/l of Yeast Extract

150 (YE). The liquid media was set in the operational condition for a few hours prior to perform a  
151 cyclic voltammetry (CV, 20 mV/s). First, the system (BES1) was inoculated with 15 g of crushed  
152 hydrothermal chimney in anaerobic condition. A chronoamperometry was carried out by the  
153 potentiostat to poise the electrode at +0.05V vs Standard Hydrogen Electrode (SHE), and a  
154 measurement of the current was taken every 10s. A cyclic voltammetry was also performed at the  
155 end of the experiment. Secondly, a new system (BES2) was inoculated in the same condition with  
156 1% of the last enrichments in flask on iron (III) oxide on yeast extract. An abiotic control and an  
157 inoculated but non-polarized control have been performed in the same conditions to exhibit the  
158 exoelectrogenic specificity of the biofilm on the polarized electrode.

#### 159 *2.5. Taxonomic and phylogenetic classification*

160 Taxonomic affiliation was performed according to (Zhang et al. 2016). DNA were extracted from  
161 1g of the crushed chimney and at the end of each experiment : from 1g of liquid from flask  
162 enrichment, on the scrapings from half of the 20cm<sup>2</sup> of working electrode and from 50ml of the  
163 liquid media of the BES and flask enrichments, which were centrifuged and suspended in 1ml of  
164 sterile water. The DNA extraction was carried out using the MoBio PowerSoil DNA isolation kit  
165 (Carlsbad, CA USA). The V4 region of the 16S rRNA gene was amplified using the universal  
166 primers 515F (5'-GTG CCA GCM GCC GCG GTA A-3') and 806R (5'-GGA CTA CNN GGG  
167 TAT CTA AT-3') with Taq&Load MasterMix (Promega) and PCR reactions were carried out using  
168 C1000 Thermal Cycler (BioRad) with the following conditions: initial denaturation at 94°C for 3  
169 min followed by 30 cycles of denaturation at 94°C for 30 s, primers annealing at 50°C for 30 s and  
170 extension at 72°C for 90 s, followed by a final extension step of 5min at 72°C. The amplified gene  
171 regions were sequenced on Illumina MiSeq 2500 platform (GeT-PlaGe, France) to generate paired-  
172 end 150bp reads. The reads were merged using the FLASH software. The taxonomic affiliation was  
173 performed with the QIIME software package v 1.9.1. Chimera were removed from the merged  
174 sequenced using UCHIME Algorithm. Then, the filtered sequences were clustered into OTUs using  
175 the RDP method with a minimum bootstrap confidence of 0.8 and OTUs were affiliated using the

176 Silva database as reference. To analyze the alpha diversity, the OTU tables were rarified to a  
177 sampling depth of 10770 sequences per library and two metrics were calculated: the richness  
178 component represented by the number of OTUs observed, and the Pielou's index representing the  
179 evenness component of our biodiversity. The construction of clone library was performed by  
180 amplifying the 16S rRNA genes by previously described PCR method with a FD1 (5'-  
181 AGAGTTTGATCCTGGCTCAG-3') and R6 (5'-TACGGCTACCTTGTTACG-3') primer set  
182 using Taq&Load MasterMix (Promega). The amplicons were cloned into the pGEM-T easy vector  
183 (Promega) and transformed into *E. coli* JM109 competent cells that were grown overnight in LB  
184 agar at 37°C. Fragment of 16S rRNA gene (~1300 bp) of the clones were sequenced by ABI3730xl  
185 (GATC Biotech) sequencers.

## 186 *2.6. Quantitative PCR of archaeal and bacterial 16S rRNA gene copies*

187 Bacterial and archaeal quantification was carried out by qPCR with SsoAdvanced™ Sybr Green  
188 Supermix on a CFX96 Real-Time System (C1000 Thermal Cycler, Bio-Rad Laboratories, CA,  
189 USA) with the primers DGGE300F (5'-GCC TAC GGG AGG CAG CAG-3') and Univ516 (5'-  
190 GTD TTA CCG CGG CKG CTG RCA-3') specific to Bacteria and Arc931F (5'-AGG AAT TGG  
191 CGG GGG AGC A-3') and m1100R (5'-BTG GGT CTC GCT CGT TRC C-3') for Archaea. The  
192 PCR program was composed of a 10s denaturation step at 94°C, a hybridization step of 10s at 55°C  
193 (Bacteria) or 62°C (Archaea) and a 10s elongation step at 72°C, with melting curves performed at  
194 the end of each reaction to ensure product specificity. A standard curve from 10<sup>2</sup> to 10<sup>10</sup> 16S rRNA  
195 gene copies was obtained by diluting pGEM-T plasmids harboring hyperthermophilic bacterial or  
196 archaeal rRNA gene fragment obtained from microbial community of interest. The results were  
197 expressed in copies number of 16s rRNA gene per gram of crushed chimney, per milliliter of liquid  
198 media or per cm<sup>2</sup> of surface of electrode.

## 199 **3. Results and discussion**

### 200 *3.1. Microbial diversity of hydrothermal chimney from Rainbow site of Atlantic Ocean*



201 Prior to study specifically the electroactive community putatively present on a chimney of the  
202 hydrothermal Rainbow site, an analysis of the total microbial diversity present in our crushed  
203 chimney inoculum was done by using the Illumina method. The chimney biodiversity (figure 1)  
204 was composed of 160 OTUs representing a high richness of species. As indicated by the  
205 Equitability index (0.677), the sequences were distributed relatively equally in the different OTUs.  
206 Furthermore, the taxonomic affiliation of the 160 OTUs showed that 66% were assigned to  
207 *Bacteria* and 33% to *Archaea* domains. This was consistent with the quantitative Polymerase Chain  
208 Reaction (qPCR) assays which showed a dominance of *Bacteria* (figure 2) compared to *Archaea*  
209 ( $6.38 \pm 0.05$  vs  $4.77 \pm 0.19$  log of 16S rRNA gene copies per gram of chimney, respectively). The  
210 difference of ratio obtained can be explained by the bacterial quantification by 16S rRNA gene  
211 qPCR, always overestimated because of the high number of gene copies per cells compared to  
212 *Archaea* where the number of 16S rRNA gene copies is generally equal to 1 per cell (cf. rrnDB,  
213 (Stoddard et al. 2015)). Within the bacteria domain, the OTUs were mainly assigned to 5 phyla:  
214 *Proteobacteria* (58%), *Firmicutes* (3%), *Aquificae* (1%), *Bacteroidetes* (1%) and  
215 *Thermodesulfobacteria* (1%) whereas the archaeal OTUs were only identified as *Euryarchaeota*  
216 represented by *Thermococcales* (23%) and *Archaeoglobales* (11%). This taxonomic profile was  
217 substantially similar to those previously reported on Rainbow chimneys (Cerqueira et al. 2017;  
218 Flores et al. 2011), except for the proportion of methanogens and *Desulfurococcales* found  
219 significantly lower in our samples. Despite a recognized stability in the conservation of  
220 hyperthermophilic microorganisms at low temperature (Wirth, 2017), our samples have been  
221 conserved more than 12 years at 4°C, this could mostly explain the decrease in Archaea diversity.

### 222 3.2. Enrichment of anode-respiring community in BES from crushed chimney

223 To assess the diversity of hyperthermophilic exoelectrogenic microbes from deep hydrothermal  
224 vent on conductive electrode, a fraction of a crushed chimney from the Rainbow site was used to  
225 inoculate the BioElectrochemical System (BES1). To mimic the hydrothermal vent conditions in  
226 the BES, a synthetic seawater medium, containing acetate and yeast extract as carbon and energy

227 sources, was used. Indeed, in hydrothermal vent fluid, acetate can be chemically synthesized  
228 through Fischer-Tropsch Type (FTT) reaction from H<sub>2</sub> and CO<sub>2</sub>, both obtained during  
229 serpentinization reaction (Schrenk et al. 2013). Acetate can also be biologically produced during  
230 fermentative metabolisms. It should be noted that acetate is not fermentable and needs an  
231 exogenous electron acceptor to be used as energy source for microorganisms' growth. On the other  
232 hand, YE represent here the organic compounds produced by autotrophic and heterotrophic  
233 community of hydrothermal chimney available for the fermentative/respiratory growth of  
234 microorganisms.

235 While in the control experiment (sterile and polarized anode) no notable current (0.01 A/m<sup>2</sup>, figure  
236 3) was observed during the 10 days of experiment, a raise of current density was observed after 6  
237 days of incubation in the BES1 inoculated with crushed chimney. The maximum current density  
238 reached 5.9 A/m<sup>2</sup> at 8.7 days and remained stable for few hours. The 3 mM of acetate consumed  
239 during this period as attested by HPLC measurements (data not shown) was in good agreement  
240 with the current production assuming a maximum faradic efficiency at 95-100%, as previously  
241 obtained in literature (Sengodon and Hays, 2012). After this period the current density decrease  
242 progressively probably due to the exhaustion of growth factors present in the medium and  
243 necessary to the biofilm metabolic activity. Indeed after 10 days of culture, the renewal of the  
244 medium led again to a current increase of up to 6 A/m<sup>2</sup> at maximum current density. Similarly, the  
245 current decreased after a few hours but remained stable in absence of medium renewal.

246 Cyclic voltammeteries (figure 4) have been performed after inoculation and at the end of experiment  
247 in polarized condition to observe the electrochemical profile of ElectroActive Biofilms (EAB) as  
248 catalyst of the bioelectrochemical oxidation of acetate. The anode showed the apparition of an  
249 oxidation peak with a midpoint potential at +0.06V (vs. SHE) at the end of the experimentation. No  
250 oxidation peak was observed for the solution with a new electrode immersed into the medium  
251 culture, suggesting EET mechanisms not involving mediators (data not shown). Moreover, the  
252 capacitive current (vertical distance between oxidation and reduction waves) increasing between

253 beginning and end of the culture experiments reports an increase of the electrochemical double  
254 layer and suggests the presence of a biofilm on the surface of the electrode. Thus, these results  
255 suggest the development of EAB with direct EET using acetate as electron donor.

256 In contrast to the non-polarized culture conditions, microscopic observations over time have  
257 revealed the presence of planktonic microorganisms (in the liquid medium) after 9 days of  
258 incubation in the polarized electrode culture condition. In addition, the microbial quantification by  
259 qPCR of the enrichment in BES1 shows  $7.3 \pm 0.18$  and  $9.23 \pm 0.04$  log of bacterial and archaeal  
260 16S rRNA gene copies per milliliter of liquid media and  $7.28 \pm 0.53$  and  $9.73 \pm 0.06$  log per square  
261 centimeter of electrode, respectively. On the contrary, in the non-polarized control, quantification  
262 of 16S rRNA copies was under the 2 log of sensitivity threshold of the method, indicating that no  
263 significant growth was observed under these conditions in liquid media or non-polarized electrode.  
264 Thus, the polarization of the electrode (+ 0.05V vs SHE), which served as an obligatory electrons  
265 acceptor to allow the oxidation of acetate or the weak amount of YE, seems essential also for the  
266 planktonic microbial growth.

267 To identify the microbes present on the electrode (Electrode BES1) and in liquid medium (Liquid  
268 BES1), a microbial diversity study through sequencing of the hypervariable V4 region of 16S  
269 rRNA gene (figure 1) have been performed at the end of the enrichment. 61 OTUs were obtained  
270 on Electrode 1 and 58 OTUs in Liquid Media 1, indicating of a loss of biodiversity from  
271 environmental chimney (160 OTUs). The sequences obtained are distributed in the different OTUs  
272 with however some OTUs more represented than in environmental sample (Equitability at 0.452 on  
273 Electrode 1 and 0.331 in Liquid Media 1). This can be explained by our selective conditions of  
274 enrichment with high temperature and substrate specificity. Based on average abundance analysis,  
275 the microbial diversity of enrichment culture was dominated by *Euryarchaeota* phyla (> 70%),  
276 either on electrode or in liquid medium. Interestingly, at the genus level, the dominating archaeal  
277 OTUs on electrode were closely related to *Geoglobus* spp. (45.2 %) and *Thermococcus* spp.  
278 (25.6%) whereas the planktonic microbial diversity in liquid medium is especially dominated by

279 uncultured *Thermococcus* spp. (64.1%) rather than *Geoglobus* spp. (13.3%). The bacterial diversity  
280 on the electrode and in liquid media were mainly assigned to *Thermodesulfatator* spp. (15.6% and  
281 18% respectively), while the remaining were distributed between members of *Bacillaceae* and  
282 *Micrococcaceae* families. These specific enrichments of *Archaea* compared to *Bacteria*  
283 demonstrate a shift in initial microbial community structure from the crushed chimney, surely  
284 driven by the specific BES characteristics (i.e., polarized electrode, hyperthermophilic condition).

285 Due to the limitation for taxonomic affiliation at species level of the Illumina techniques on 300bp  
286 16S fragments, we performed 16S rDNA clone libraries (figure 5) on ~1300bp 16S sequence. It  
287 allowed identifying the *Thermococcus* spp. as closely related to *Thermococcus thioeducens*, *T.*  
288 *coalecens*, *T. barossi*, *T. peptonophilus*, *T. celer* (98% similarities with them) and an unidentified  
289 *Thermococcus* species (95% similarity with *Thermococcus thioeducens*). However, because of the  
290 high levels of similarity between species of the genus *Thermococcus*, the taxonomic affiliation  
291 through the coding gene for 16S rRNA is not sufficient to determine the *Thermococcus* species  
292 present in enrichments.

293 However, among the *Geoglobus* spp. the taxonomic affiliation from clone libraries (figure 5) has  
294 allowed to identify two species: *Geoglobus ahangari* (99% similarity) and a novel genus or species  
295 of the *Archaeoglobaceae* family (MG694212 and MG694224: 95 % of similarity vs *Geoglobus*  
296 *ahangari*). This novel taxon is exclusively found in the electrode area. Interestingly, this affiliation  
297 has been possible only through near full 16S rRNA gene sequence (1300 pb) alignment. Indeed, the  
298 hypervariable V4 region of the rRNA gene (~290pb), used to the study of microbial diversity by  
299 Illumina-based analysis, did not allow to phylogenetically differentiate this novel taxon from  
300 *Geoglobus ahangari*. Differences are remarkable at level of hypervariable V6 to V8 regions.

301 The discovery of *Geoglobus* species enrichment on the electrode is remarkable. The two species of  
302 *Geoglobus* described so far (*G. ahangari* and *G. acetivorans*) are known to grow autotrophically  
303 using H<sub>2</sub> or heterotrophically using a large number of organic compounds with in both cases soluble  
304 or insoluble iron III oxide as a final electrons acceptor (Manzella et al. 2013). More recently, it has

305 been shown that *Geoglobus ahangari* was exoelectrogenic by direct contact when placed in one-  
306 chamber microbial electrolysis cells at 80°C. In contrast to our results, the current produced was  
307 particularly weak probably due to its use as an axenic culture, and its lack of enzymatic component  
308 to resist to oxidative stress on electrode (Yilmazel et al. 2018). Similarly, the type species of  
309 *Geoglobus ahangari* tested in our laboratory had a slow and difficult growth on conductive support  
310 and was unable to grow after three subcultures under optimal culture conditions. Thus, observing  
311 the presence of *Geoglobus* spp. in our system suggests that the latter requires to be cultured in a  
312 consortium.

313 Phylogenetic analysis of 16S rRNA clone libraries has led to the identification of taxon  
314 *Thermodesulfatator atlanticus* among the *Thermodesulfatator* spp. previously identified in high  
315 throughput sequencing. This bacterium, that have been also isolated from a Rainbow site chimney,  
316 is known to be chemolithoautotrophic, sulfate-reducing obligate bacterium that uses H<sub>2</sub> as electron  
317 donor and CO<sub>2</sub> and peptide as carbon source (Alain et al. 2010). A close related species,  
318 *Thermodesulfobacterium commune* has already been identified in EAB on electrode of a MFC (Fu  
319 et al. 2015)

### 320 3.3. Enrichment of hyperthermophilic microorganisms on crystalline iron (III) oxide

321 In parallel of the first BES previously described, flask enrichments with insoluble metallic electron  
322 acceptor were done. Crushed chimney was inoculated in anaerobic mineral medium added with  
323 crystalline Fe (III) oxide ( $\alpha$ -Fe<sub>2</sub>O<sub>3</sub>: hematite) as electron acceptor (Wahid and Kamalam, 1993),  
324 acetate (10 mM) and yeast extract (4 g/l) as energy and carbon source. After 2 days of static  
325 incubation at 80°C, the hematite is completely reduced to black compounds (magnetic particles)  
326 and the head space of the flask contained 32% of CO<sub>2</sub>, 0.2% of H<sub>2</sub> and 10% of CH<sub>4</sub>. A production  
327 of acetate was also observed in the liquid media, reaching 12 mM at the end of the experiment. The  
328 next subcultures reached the black coloration in less than 24 hours with similar concentration of  
329 each gas in the headspace of the flasks and same profile of metabolites in the liquid media. The  
330 presence of a thin biofilm could be observed on the surface of the agglomerated iron oxide. An

331 abiotic control with a mix of acetate, yeast extract, H<sub>2</sub>, CH<sub>4</sub> and CO<sub>2</sub> didn't show black coloration of  
332 iron oxide after one month of incubation at 80°C. These results suggest the development of a  
333 community of fermentative organisms producing acetate and electroactive microorganisms able to  
334 oxidize organic compounds brought by the YE (peptides, carbohydrates, etc.) and acetate in the  
335 culture medium for the reduction of crystalline iron (III) oxide.

336 The biodiversity enriched in flask was composed of 29 OTUs, and the sequences were relatively  
337 concentrated in dominant OTUs (equitability at 0.292). At the family level, the microbial diversity  
338 was dominated by bacterial OTUs related to *Clostridiaceae* (73%), and *Thermodesulfobacteriaceae*  
339 (3%). The archaeal OTUs represented only 24% of the biodiversity distributed between  
340 *Thermococcaceae* (20.5 %), *Methanococcaceae* (3%) identified as *Methanotorris igneus* species  
341 and *Archaeoglobaceae* (0.5%). The quantification showed an enrichment of 9 log of bacterial and 7  
342 log of archaeal 16S rRNA gene copies which demonstrated a shift of enrichment toward the  
343 preferential bacterial growth in opposition with BES enrichment. Interestingly, the taxonomic  
344 affiliation showed that members of the *Clostridiaceae* OTUs were closely related in clone libraries  
345 to *Caloranaerobacter ferrireducens* (97% of identity), fermentative microorganism which is  
346 known to use crystalline iron (III) reduction as a minor pathway for electron flow while fermenting  
347 sugars or amino acids to a mixture of volatile fatty acids (acetate, butyrate) and hydrogen (Zheng et  
348 al. 2015). *Archaeoglobaceae* accounted for only 0.5% of the microbial communities in this  
349 enrichment and have been closely related from clone libraries analysis to *Geoglobus ahangari*  
350 (99% of identity). As mentioned above, *Geoglobus ahangari* is known to reduce amorphous iron  
351 (III) oxide and these culture conditions with crystalline form do not seem to favor its growth  
352 (Wahid & Kamalan, 1993). Thus, these results could suggest the organization of a kind of trophic  
353 chain in our flask enrichment. The new iron reducing species close to *Caloranaerobacter*  
354 *ferrireducens* would have used organic compounds from yeast extract to reduce crystalline iron  
355 (III) oxide. The *Thermococcus* would have grown on peptides or carbohydrates from yeast extract  
356 or partly produced by *Firmicutes*, and both would have produced H<sub>2</sub>. The methanogens such as  
357 *Methanotorris igneus* would then have used the H<sub>2</sub> to produce methane.

358

359

360 *3.4. Solid electron acceptor determine the microbial ecology of electroactive enrichment*

361 In this context, a new BioElectrochemical System (BES2) was inoculated with the flask enrichment  
362 on YE/acetate to assess the specificity of the microbial community obtained on the electrode.  
363 Experimental conditions were exactly the same as for BES1. Contrary to BES1, a lag time of 3  
364 days (figure 3) has been observed before the increase of the current. After 4.5 days the current has  
365 reached 2.4 A/m<sup>2</sup> and stayed stable during about 1 day before decreasing rapidly. Phase contrast  
366 microscopic observations during the replacement of the culture medium in BES2 have shown the  
367 only presence of irregular coccoid cells. Thereafter, the current density reached a maximum of 3.4  
368 A/m<sup>2</sup> at 4 days after the renewal of the culture medium. This phase of current production came  
369 along with a decrease of acetate as observed in the BES1 (data not shown). Cyclic voltammetry  
370 (figure 4) exhibit oxidation peak appearing between initial time and final time with a midpoint  
371 potential at +0.053 V (vs. SHE), slightly offset compared to the one obtained with BES1.

372 The biodiversity indexes between YE enrichment in flask and BES2 showed a loss of richness of  
373 species from 29 to 26 OTUs, and equitability from 0.292 to about 0.17, indicating a loss of  
374 biodiversity dominated only by a few OTUs. Furthermore, only *Archaea* were detected in BES2,  
375 when they were trivial in Flask enrichment. The dominating OTUs (figure 1) were closely related  
376 to *Thermococcaceae* uncultured species at 87.2% on electrode and 95.4% in liquid media of total  
377 OTUs. The remaining archaeal diversity was composed of *Archaeaoglobaceae* spp. (12.7% and  
378 4.5%), with clones (figure 5a) affiliated to *Geoglobus ahangari* (99% identity) and unknown  
379 species belonging to *Archaeoglobaceae* family (95% identity with *Geoglobus ahangari*) similarly  
380 found on BES1 electrode. No *Caloranaerobacter* spp. or *Thermodesulfobacteriaceae* spp. growth  
381 was observed on the BES2 neither on electrode nor in liquid media. This is supported by the qPCR,  
382 which has shown a drastic difference of 4 log between archaeal (9 log) and bacterial (5 log) 16S  
383 rRNA copies per milliliter of liquid media and square meter of electrode.

384 It should be pointed out that the flask YE enrichment did not promote growth of *Archaeoglobales*  
385 or *Archaea* in general, whereas they seemed to be re-enriched in the BES2 conditions. These  
386 results suggest the specific enrichment on polarized electrode of *Archaea* belonging to  
387 *Thermococcales* and *Archeoglobales* in our BES condition. It is noteworthy that the biodiversity  
388 indexes showed a loss of biodiversity in BES compared to crushed chimney due to selective  
389 condition of our experiment to enrich preferentially the electroactive microorganisms. However, in  
390 each BES, the richness and the equitability are more important on polarized electrode than in liquid  
391 media, suggesting a specific enrichment of more diverse species and better distribution of microbial  
392 population on polarized support. According to the absence of growth in non-polarized electrode  
393 and the more important diversity on electrode than in liquid, the microbial diversity found in liquid  
394 media would arise from EAB which develop on the electrode. This is supported by the really low  
395 H<sub>2</sub> production in BES (data not shown) - H<sub>2</sub> being normally produced by *Thermococcus* sp. during  
396 fermentative metabolisms - which could be explained by a lack of carbon and energy source in  
397 liquid media. Thus, in absence of possible known metabolism for *Thermococcus* species in liquid,  
398 we would suggest *Thermococcus* cells to be in quiescent conditions after it is released from BEA.  
399 Its growth would thus have an obligatory dependence on the polarized electrode.

400 If the presence of *Geoglobus* species is consistent with its known capacity to transfer EET with  
401 acetate as electron donor (Yilmazel et al. 2018), *Thermococcus* species abundance on polarized  
402 electrode is more surprising. *Thermococcales* are known to share an energetic peptidic or  
403 carbohydrate metabolisms, associated necessarily or not with the reduction of elemental sulfur  
404 (Bertoldo and Antranikian, 2006). In addition, it was shown that some species have the capacity to  
405 growth by using Extracellular Polymeric Substances (EPS) of microbial origin (dextran, pullulan,  
406 peptides, etc.) (Legin et al. 1998). So far, no respiration ability on electrode or direct EET  
407 mechanism have been reported about this archaeal genera, even if some *Thermococcus* species  
408 have been shown to reduce amorphous iron (III) oxide. However, the mechanism is still unclear  
409 and could be mediated through electron transfer to humic substances and other extracellular  
410 quinones (Lovley et al. 2000, Slobdokin et al. 2001). Furthermore, a recent study has highlighted



411 the possibility of hydroquinone for microbial electron transfer to electrically conductive minerals,  
412 especially with pyrite composing hydrothermal chimney, or electrode (Taran, 2017). Nevertheless,  
413 no current was obtained with replacement of electrode with spent media, indicating no mediated  
414 electron transport in our condition. However, species of *Thermococcus* genus have been reported to  
415 produce nanopods or nanotubes by budding of their cell envelope but their function have not been  
416 fully understood (Marguet et al. 2013). As suggested by the authors, these archaeal nanopods or  
417 nanotubes could be used to expand the metabolic sphere around cells, promote intercellular  
418 communication or act in sulfur detoxifying mechanisms (Gorlas et al. 2015). We can therefore  
419 suggest a role of these nanotubes in EET as previously described on *Shewanella oneidensis* with  
420 the formation of conductive nanofilaments by extensions of the outer membrane. This bacterial  
421 EET mechanism involves cytochrome-c on the external membrane, not present in *Thermococcus*  
422 genome, allowing the electron transport along the filament to conductive support (Pirbadian et al.  
423 2014). Thus, *Thermococcus* sp. could potentially be exoelectrogenic microorganisms through a still  
424 unknown mechanism.

425 Remarkably, the obligatory presence of both *Thermococcus* and *Geoglobus* species found in each  
426 BES on the polarized electrode did not seem fortuitous. Assuming that the *Thermococcus* species  
427 found in our enrichment are heterotroph, after consumption of YE traces, their only carbon source  
428 available would be the EPS or organic compounds produced by *Geoglobus* spp. present on  
429 polarized electrode. Then, their fermentative metabolism would lead to the production of acetate,  
430 H<sub>2</sub> and CO<sub>2</sub> which could then be used by *Geoglobus* species to grow using the electrode as the  
431 ultimate electrons acceptor. However, recent data have shown the inability of *Geoglobus* to transfer  
432 electrons to an electrode from H<sub>2</sub> (Yilmazel et al. 2018). Previous studies have shown that some  
433 electroactive bacteria are also able to grow syntrophically with other microorganisms via direct  
434 interspecies electron transfer (DIET) (Shrestha and Rotaru, 2014). As explained previously,  
435 *Geoglobus ahangari* has shown a weak electron transfer capacity when grown in pure culture. The  
436 higher current density obtained in our conditions would suggest that the *Geoglobus* sp. and  
437 *Thermococcales* enriched on our polarized electrodes live syntrophically to improve their growth,

438 and subsequently increased the quantity of electrons transferred to the electrode. Thus we would  
439 suggest that there is a syntrophic mechanism, with potentially DIET, between *Thermococcus* and  
440 *Geoglobus* in deep hydrothermal vents.

#### 441 **4. Conclusion**

442 This study is the first to report on the enrichment of electroactive consortium in ex-situ conditions  
443 that mimic the conductive chimney of a hydrothermal vent with polarized carbon cloth in  
444 anaerobic artificial seawater at 80°C. Moreover, we demonstrate the specificity of enrichment of  
445 *Bacteria* on Iron (III) oxide compared to the enrichment of *Archaea* (mainly *Thermococcus sp.* and  
446 *Geoglobus sp.*) on BES, where the biodiversity is more conserved. These results comfort the  
447 hypothesis of electroactivity as a well-represented metabolism in this type of environment by  
448 confirming the presence of exoelectrogenic microorganisms capable of external electron transfer to  
449 conductive support.

#### 450 **Acknowledgements**

451 This work was financially supported by the National Interdisciplinary Program of CNRS “Initiative  
452 structurante EC2CO” (MICROBIEN). The authors thank Erwan Roussel (LM2E, IFREMER Brest)  
453 for helpful suggestions.

#### 454 **References**

- 455 Alain, K., Postec, A., Grinsard, E., Lesongeur, F., Prieur, D., Godfroy, A., 2010.  
456 *Thermodesulfatator atlanticus* sp. nov., a thermophilic, chemolithoautotrophic, sulfate-  
457 reducing bacterium isolated from a Mid-Atlantic Ridge hydrothermal vent. *Int. J. Syst.*  
458 *Evol. Microbiol.* 60, 33–38. <https://doi.org/10.1099/ijms.0.009449-0>
- 459 Allen, R.M., Bennetto, H.P., 1993. Microbial fuel-cells. *Appl. Biochem. Biotechnol.* 39–40, 27–40.  
460 <https://doi.org/10.1007/BF02918975>
- 461 Boileau, C., Auria, R., Davidson, S., Casalot, L., Christen, P., Liebgott, P.-P., Combet-Blanc, Y.,  
462 2016. Hydrogen production by the hyperthermophilic bacterium *Thermotoga maritima* part

- 463 I: effects of sulfured nutriments, with thiosulfate as model, on hydrogen production and  
464 growth. *Biotechnol. Biofuels* 9, 269. <https://doi.org/10.1186/s13068-016-0678-8>
- 465 Busalmen, J.P., Esteve-Núñez, A., Berná, A., Feliu, J.M., 2008. C-Type Cytochromes Wire  
466 Electricity-Producing Bacteria to Electrodes. *Angew. Chem.* 120, 4952–4955.  
467 <https://doi.org/10.1002/ange.200801310>
- 468 Cao, H., Wang, Y., Lee, O.O., Zeng, X., Shao, Z., Qian, P.-Y., 2014. Microbial Sulfur Cycle in  
469 Two Hydrothermal Chimneys on the Southwest Indian Ridge. *mBio* 5, e00980-13-e00980-  
470 13. <https://doi.org/10.1128/mBio.00980-13>
- 471 Cerqueira, T., Pinho, D., Froufe, H., Santos, R.S., Bettencourt, R., Egas, C., 2017. Sediment  
472 Microbial Diversity of Three Deep-Sea Hydrothermal Vents Southwest of the Azores.  
473 *Microb. Ecol.* 74, 332–349. <https://doi.org/10.1007/s00248-017-0943-9>
- 474 Dick, G.J., Anantharaman, K., Baker, B.J., Li, M., Reed, D.C., Sheik, C.S., 2013. The  
475 microbiology of deep-sea hydrothermal vent plumes: ecological and biogeographic  
476 linkages to seafloor and water column habitats. *Front. Microbiol.* 4.  
477 <https://doi.org/10.3389/fmicb.2013.00124>
- 478 Doyle, L.E., Marsili, E., 2015. Methods for enrichment of novel electrochemically-active  
479 microorganisms. *Bioresour. Technol.* <https://doi.org/10.1016/j.biortech.2015.07.025>
- 480 Flores, G.E., Campbell, J.H., Kirshtein, J.D., Meneghin, J., Podar, M., Steinberg, J.I., Seewald,  
481 J.S., Tivey, M.K., Voytek, M.A., Yang, Z.K., Reysenbach, A.-L., 2011. Microbial  
482 community structure of hydrothermal deposits from geochemically different vent fields  
483 along the Mid-Atlantic Ridge. *Environ. Microbiol.* 13, 2158–2171.  
484 <https://doi.org/10.1111/j.1462-2920.2011.02463.x>
- 485 Fu, Q., Fukushima, N., Maeda, H., Sato, K., Kobayashi, H., 2015. Bioelectrochemical analysis of a  
486 hyperthermophilic microbial fuel cell generating electricity at temperatures above 80 °C.  
487 *Biosci. Biotechnol. Biochem.* 0, 1–7. <https://doi.org/10.1080/09168451.2015.1015952>
- 488 Fu, Q., Kobayashi, H., Kawaguchi, H., Wakayama, T., Maeda, H., Sato, K., 2013. A Thermophilic  
489 Gram-Negative Nitrate-Reducing Bacterium, *Calditerrivibrio nitroreducens*, Exhibiting

- 490 Electricity Generation Capability. *Environ. Sci. Technol.* 47, 12583–12590.  
491 <https://doi.org/10.1021/es402749f>
- 492 Girguis, P.R., Holden, J.F., 2012. On the Potential for Bioenergy and Biofuels from Hydrothermal  
493 Vent Microbes. *Oceanography*.
- 494 Godfroy, A., 2005. EXOMAR cruise, RV L'Atalante [WWW Document]. URL  
495 <http://dx.doi.org/10.17600/5010100>
- 496 Gorby, Y.A., Yanina, S., McLean, J.S., Rosso, K.M., Moyles, D., Dohnalkova, A., Beveridge, T.J.,  
497 Chang, I.S., Kim, B.H., Kim, K.S., Culley, D.E., Reed, S.B., Romine, M.F., Saffarini,  
498 D.A., Hill, E.A., Shi, L., Elias, D.A., Kennedy, D.W., Pinchuk, G., Watanabe, K., Ishii, S.,  
499 Logan, B., Nealson, K.H., Fredrickson, J.K., 2006. Electrically conductive bacterial  
500 nanowires produced by *Shewanella oneidensis* strain MR-1 and other microorganisms.  
501 *Proc. Natl. Acad. Sci.* 103, 11358–11363. <https://doi.org/10.1073/pnas.0604517103>
- 502 Ha, P.T., Lee, T.K., Rittmann, B.E., Park, J., Chang, I.S., 2012. Treatment of Alcohol Distillery  
503 Wastewater Using a Bacteroidetes-Dominant Thermophilic Microbial Fuel Cell. *Environ.*  
504 *Sci. Technol.* 46, 3022–3030. <https://doi.org/10.1021/es203861v>
- 505 Hinks, J., Zhou, M., Dolfing, J., 2017. Microbial Electron Transport in the Deep Subsurface, in:  
506 Chénard, C., Lauro, F.M. (Eds.), *Microbial Ecology of Extreme Environments*. Springer  
507 International Publishing, Cham, pp. 81–102.
- 508 Hogarth, M.P., 1995. The development of the direct methanol fuel cell. (Ph.D.). University of  
509 Newcastle upon Tyne.
- 510 Huber, J.A., Cantin, H.V., Huse, S.M., Mark Welch, D.B., Sogin, M.L., Butterfield, D.A., 2010.  
511 Isolated communities of *Epsilonproteobacteria* in hydrothermal vent fluids of the Mariana  
512 Arc seamounts: *Epsilonproteobacteria* in vents of the Mariana Arc. *FEMS Microbiol.*  
513 *Ecol. no-no*. <https://doi.org/10.1111/j.1574-6941.2010.00910.x>
- 514 J. McCormick, A., Bombelli, P., M. Scott, A., J. Philips, A., G. Smith, A., C. Fisher, A., J. Howe,  
515 C., 2011. Photosynthetic biofilms in pure culture harness solar energy in a mediatorless

- 516 bio-photovoltaic cell (BPV) system. *Energy Environ. Sci.* 4, 4699–4709.  
517 <https://doi.org/10.1039/C1EE01965A>
- 518 Jong, B.C., Kim, B.H., Chang, I.S., Liew, P.W.Y., Choo, Y.F., Kang, G.S., 2006. Enrichment,  
519 Performance, and Microbial Diversity of a Thermophilic Mediatorless Microbial Fuel Cell.  
520 *Environ. Sci. Technol.* 40, 6449–6454. <https://doi.org/10.1021/es0613512>
- 521 Koch, C., Harnisch, F., 2016. Is there a Specific Ecological Niche for Electroactive  
522 Microorganisms? *ChemElectroChem* 3, 1282–1295.  
523 <https://doi.org/10.1002/celec.201600079>
- 524 Konn, C., Charlou, J.L., Holm, N.G., Mousis, O., 2015. The Production of Methane, Hydrogen,  
525 and Organic Compounds in Ultramafic-Hosted Hydrothermal Vents of the Mid-Atlantic  
526 Ridge. *Astrobiology* 15, 381–399. <https://doi.org/10.1089/ast.2014.1198>
- 527 Kristall, B., Kelley, D.S., Hannington, M.D., Delaney, J.R., 2006. Growth history of a diffusely  
528 venting sulfide structure from the Juan de Fuca Ridge: A petrological and geochemical  
529 study: DIFFUSELY VENTING SULFIDE STRUCTURE. *Geochem. Geophys.*  
530 *Geosystems* 7, n/a-n/a. <https://doi.org/10.1029/2005GC001166>
- 531 Kumar, A., Hsu, L.H.-H., Kavanagh, P., Barrière, F., Lens, P.N.L., Lapinsonnière, L., V, J.H.L.,  
532 Schröder, U., Jiang, X., Leech, D., 2017. The ins and outs of microorganism–electrode  
533 electron transfer reactions. *Nat. Rev. Chem.* 1, 24. [https://doi.org/10.1038/s41570-017-](https://doi.org/10.1038/s41570-017-0024)  
534 0024
- 535 Legin, E., Copinet, A., Duchiron, F., 1998. Production of thermostable amyolytic enzymes by  
536 *Thermococcus hydrothermalis*. *Biotechnol. Lett.* 20, 363–367.  
537 <https://doi.org/10.1023/A:1005375213196>
- 538 Logan, B.E., Hamelers, B., Rozendal, R., Schröder, U., Keller, J., Freguia, S., Aelterman, P.,  
539 Verstraete, W., Rabaey, K., 2006. Microbial fuel cells: Methodology and technology.  
540 *Environ. Sci. Technol.* 40, 5181–5192.
- 541 Lusk, B.G., Khan, Q.F., Parameswaran, P., Hameed, A., Ali, N., Rittmann, B.E., Torres, C.I., 2015.  
542 Characterization of Electrical Current-Generation Capabilities from Thermophilic

- 543 Bacterium *Thermoanaerobacter pseudethanolicus* Using Xylose, Glucose, Cellobiose, or  
544 Acetate with Fixed Anode Potentials. *Environ. Sci. Technol.* 49, 14725–14731.  
545 <https://doi.org/10.1021/acs.est.5b04036>
- 546 Marshall, C.W., May, H.D., 2009. Electrochemical evidence of direct electrode reduction by a  
547 thermophilic Gram-positive bacterium, *Thermincola ferriacetica*. *Energy Environ. Sci.* 2,  
548 699. <https://doi.org/10.1039/b823237g>
- 549 Marsili, E., Baron, D.B., Shikhare, I.D., Coursolle, D., Gralnick, J.A., Bond, D.R., 2008.  
550 *Shewanella* secretes flavins that mediate extracellular electron transfer. *Proc. Natl. Acad.*  
551 *Sci.* 105, 3968–3973. <https://doi.org/10.1073/pnas.0710525105>
- 552 Mathis, B.J., Marshall, C.W., Milliken, C.E., Makkar, R.S., Creager, S.E., May, H.D., 2007.  
553 Electricity generation by thermophilic microorganisms from marine sediment. *Appl.*  
554 *Microbiol. Biotechnol.* 78, 147–155. <https://doi.org/10.1007/s00253-007-1266-4>
- 555 Miroshnichenko, M.L., Bonch-Osmolovskaya, E.A., 2006. Recent developments in the  
556 thermophilic microbiology of deep-sea hydrothermal vents. *Extremophiles* 10, 85–96.  
557 <https://doi.org/10.1007/s00792-005-0489-5>
- 558 Reguera, G., Nevin, K.P., Nicoll, J.S., Covalla, S.F., Woodard, T.L., Lovley, D.R., 2006. Biofilm  
559 and Nanowire Production Leads to Increased Current in *Geobacter sulfurreducens* Fuel  
560 Cells. *Appl. Environ. Microbiol.* 72, 7345–7348. <https://doi.org/10.1128/AEM.01444-06>
- 561 Schrenk, M.O., Brazelton, W.J., Lang, S.Q., 2013. Serpentinization, Carbon, and Deep Life. *Rev.*  
562 *Mineral. Geochem.* 75, 575–606. <https://doi.org/10.2138/rmg.2013.75.18>
- 563 Schröder, U., Harnisch, F., Angenent, L.T., 2015. Microbial electrochemistry and technology:  
564 terminology and classification. *Energy Env. Sci* 8, 513–519.  
565 <https://doi.org/10.1039/C4EE03359K>
- 566 Sekar, N., Umasankar, Y., P. Ramasamy, R., 2014. Photocurrent generation by immobilized  
567 cyanobacteria via direct electron transport in photo-bioelectrochemical cells. *Phys. Chem.*  
568 *Chem. Phys.* 16, 7862–7871. <https://doi.org/10.1039/C4CP00494A>

- 569 Sekar, N., Wu, C.-H., Adams, M.W.W., Ramasamy, R.P., 2017. Electricity generation by  
570 *Pyrococcus furiosus* in microbial fuel cells operated at 90°C. *Biotechnol. Bioeng.* 114,  
571 1419–1427. <https://doi.org/10.1002/bit.26271>
- 572 Sengodan, P., Hays, D.B., 2012. *Microbial Fuel Cells. Future Fuel Technologies*, National  
573 Petroleum Council (NPC) Study
- 574 Shehab, N.A., Ortiz-Medina, J.F., Katuri, K.P., Hari, A.R., Amy, G., Logan, B.E., Saikaly, P.E.,  
575 2017. Enrichment of extremophilic exoelectrogens in microbial electrolysis cells using Red  
576 Sea brine pools as inocula. *Bioresour. Technol.* 239, 82–86.  
577 <https://doi.org/10.1016/j.biortech.2017.04.122>
- 578 Shi, L., Dong, H., Reguera, G., Beyenal, H., Lu, A., Liu, J., Yu, H.-Q., Fredrickson, J.K., 2016.  
579 Extracellular electron transfer mechanisms between microorganisms and minerals. *Nat.*  
580 *Rev. Microbiol.* 14, 651–662. <https://doi.org/10.1038/nrmicro.2016.93>
- 581 Shi, L., Squier, T.C., Zachara, J.M., Fredrickson, J.K., 2007. Respiration of metal (hydr)oxides by  
582 *Shewanella* and *Geobacter*: a key role for multihaem c-type cytochromes. *Mol. Microbiol.*  
583 65, 12–20. <https://doi.org/10.1111/j.1365-2958.2007.05783.x>
- 584 Shrestha, P.M., Rotaru, A.-E., 2014. Plugging in or going wireless: strategies for interspecies  
585 electron transfer. *Front. Microbiol.* 5, 237. <https://doi.org/10.3389/fmicb.2014.00237>
- 586 Stoddard, S.F., Smith, B.J., Hein, R., Roller, B.R.K., Schmidt, T.M., 2015. rrnDB: improved tools  
587 for interpreting rRNA gene abundance in bacteria and archaea and a new foundation for  
588 future development. *Nucleic Acids Res.* 43, D593-598.  
589 <https://doi.org/10.1093/nar/gku1201>
- 590 Uzarraga, R., Auria, R., Davidson, S., Navarro, D., Combet-Blanc, Y., 2011. New Cultural  
591 Approaches for Microaerophilic Hyperthermophiles. *Curr. Microbiol.* 62, 346–350.  
592 <https://doi.org/10.1007/s00284-010-9712-4>
- 593 Vetriani, C., Voordeckers, J.W., Crespo-Medina, M., O'Brien, C.E., Giovannelli, D., Lutz, R.A.,  
594 2014. Deep-sea hydrothermal vent *Epsilonproteobacteria* encode a conserved and

- 595 widespread nitrate reduction pathway (Nap). ISME J. 8, 1510–1521.  
596 <https://doi.org/10.1038/ismej.2013.246>
- 597 Wirth, R., 2017. Colonization of Black Smokers by Hyperthermophilic Microorganisms. Trends  
598 Microbiol. 25, 92–99. <https://doi.org/10.1016/j.tim.2016.11.002>
- 599 Wrighton, K.C., Agbo, P., Warnecke, F., Weber, K.A., Brodie, E.L., DeSantis, T.Z., Hugenholtz,  
600 P., Andersen, G.L., Coates, J.D., 2008. A novel ecological role of the Firmicutes identified  
601 in thermophilic microbial fuel cells. ISME J. 2, 1146–1156.  
602 <https://doi.org/10.1038/ismej.2008.48>
- 603 Wrighton, K.C., Thrash, J.C., Melnyk, R.A., Bigi, J.P., Byrne-Bailey, K.G., Remis, J.P., Schichnes,  
604 D., Auer, M., Chang, C.J., Coates, J.D., 2011. Evidence for Direct Electron Transfer by a  
605 Gram-Positive Bacterium Isolated from a Microbial Fuel Cell. Appl. Environ. Microbiol.  
606 77, 7633–7639. <https://doi.org/10.1128/AEM.05365-11>
- 607 Yamamoto, M., Nakamura, R., Kasaya, T., Kumagai, H., Suzuki, K., Takai, K., 2017. Spontaneous  
608 and Widespread Electricity Generation in Natural Deep-Sea Hydrothermal Fields. Angew.  
609 Chem. Int. Ed. 56, 5725–5728. <https://doi.org/10.1002/anie.201701768>
- 610 Yilmazel, Y.D., Zhu, X., Kim, K.-Y., Holmes, D.E., Logan, B.E., 2018. Electrical current  
611 generation in microbial electrolysis cells by hyperthermophilic archaea *Ferroglobus*  
612 *placidus* and *Geoglobus ahangari*. Bioelectrochemistry 119, 142–149.  
613 <https://doi.org/10.1016/j.bioelechem.2017.09.012>
- 614 Zhang, L., Kang, M., Xu, J., Xu, J., Shuai, Y., Zhou, X., Yang, Z., Ma, K., 2016. Bacterial and  
615 archaeal communities in the deep-sea sediments of inactive hydrothermal vents in the  
616 Southwest India Ridge. Sci. Rep. 6. <https://doi.org/10.1038/srep25982>
- 617
- 618
- 619
- 620



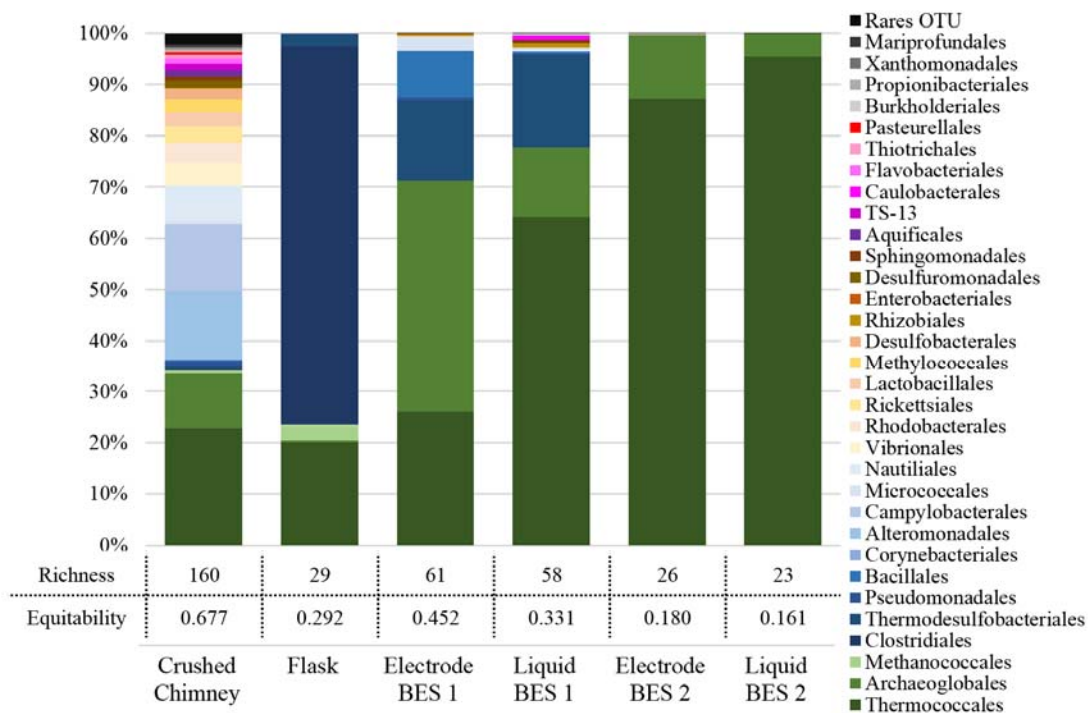

Figure 1: Dominant taxonomic affiliation and biodiversity indices of microbial communities from Crushed Chimney, Flask enrichment on iron (III) oxide, Electrode and Liquid media from BES1 and BES2. OTUs representing lower than 0.5% of total sequences of the sample was grouped as Rares OTU. Biodiversity indexes of Richness and Equitability represent the number of observed OTU and the Pielou's *J'* evenness index respectively.

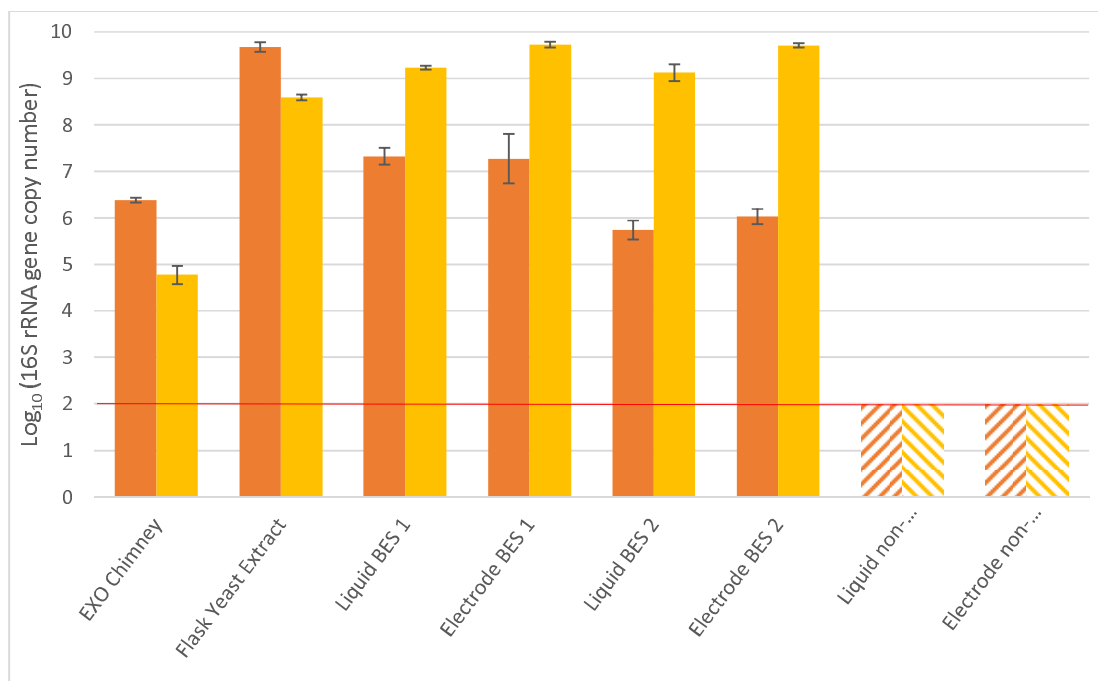

Figure 2: Quantification of 16S rRNA gene copies from Bacteria (orange) or Archaea (yellow) per gram of crushed chimney, per milliliter of liquid or per cm<sup>2</sup> of working electrode. The red line represents the minimum threshold of sensitivity of the qPCR method. Error bar represent the standard deviation obtained on triplicates.

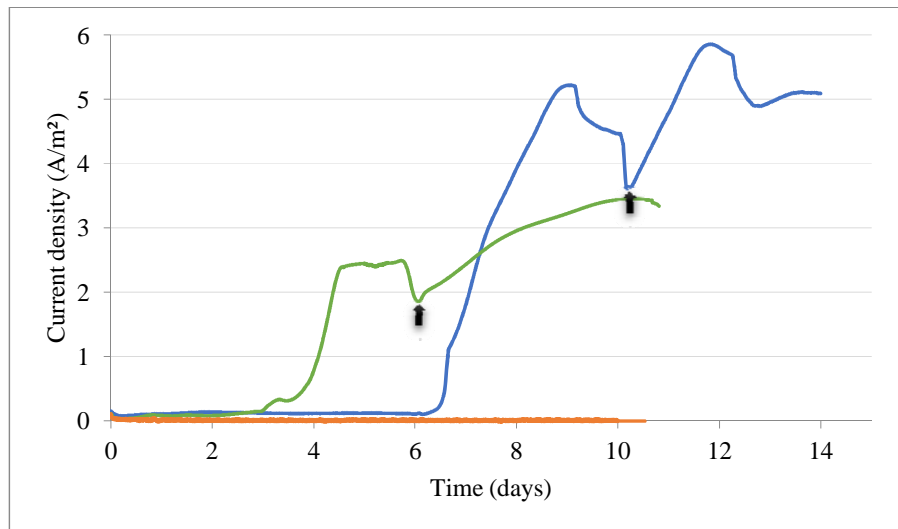

Figure 3: Current monitoring (A/m<sup>2</sup>) of BES1 Enrichment inoculated with crushed hydrothermal chimney (blue line), BES2 Enrichment inoculated with flask subculture (green line) and controls (orange line). Arrows represent the renewal of the liquid media.

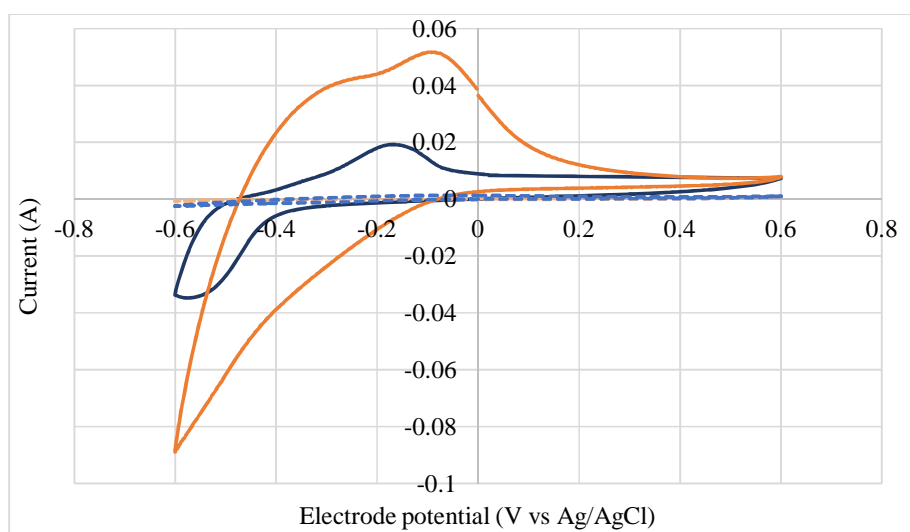

Figure 4: Cyclic Voltammeteries between -0,6V and +0,6V at 20mV/s of Working Electrode at initial time (dot lines) and final time (full line) in BES1 (blue line) and BES2 (orange line).

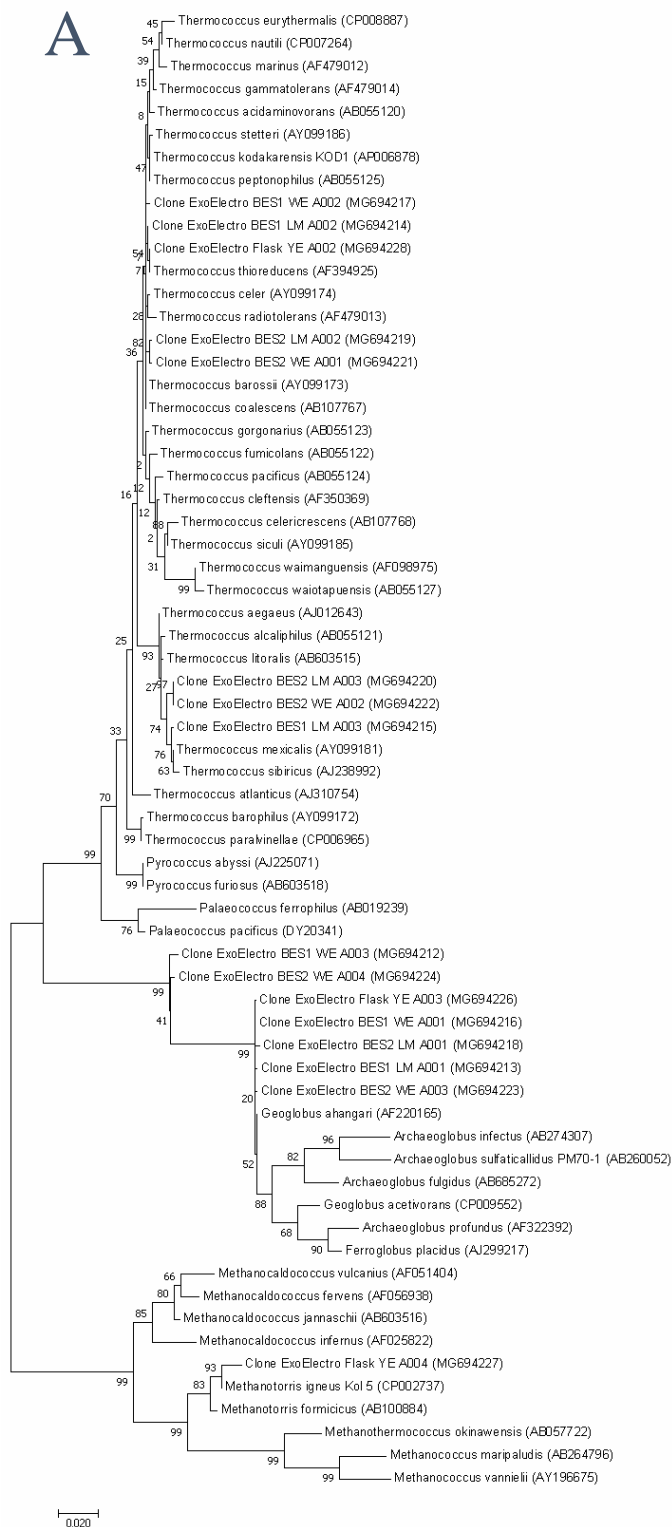

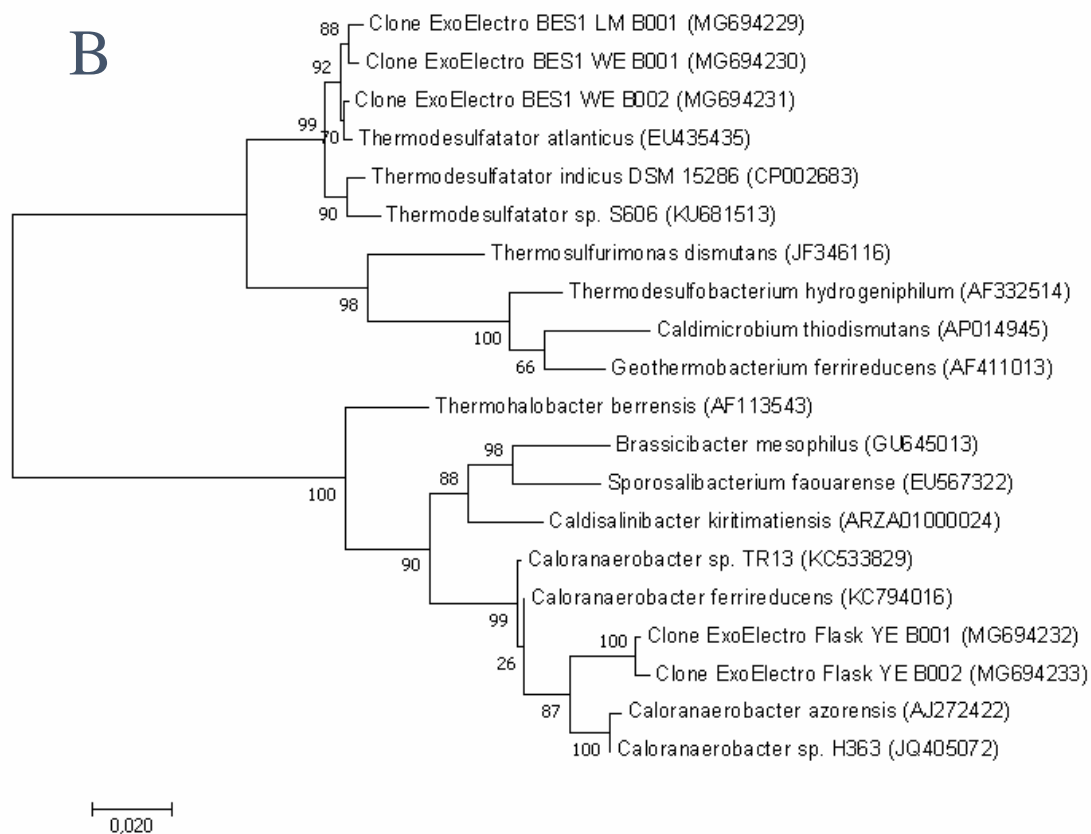

Figure 5: Phylogenetic tree of archaeal (A) and bacterial (B) 16S rRNA clones library from Flask enrichment and Electrode (WE) or liquid media (LM) of BES1 and BES2. Percentages at nodes are bootstrap values based on 500 replications. Scale bar indicated substitutions per site.

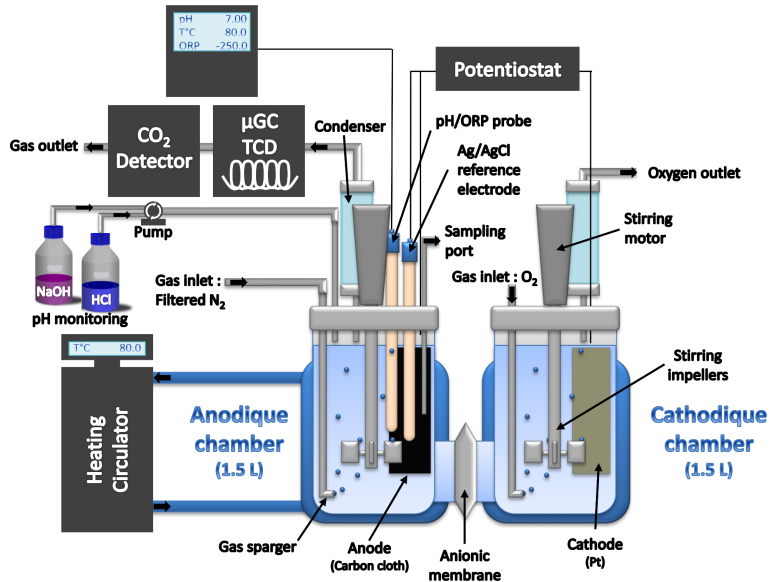

Source: http://biorxiv.org/content/10.1101/272039v2.full.pdf
